# Supplementary material
Source: PubMed Central journal article supplement (PMC9633456)
Supplement: NIHMS1841940-supplement-Supplementary_Methods.pdf [file NIHMS1841940-supplement-Supplementary_Methods.pdf]

## Supplementary information

---

# Utilizing Skyline to analyze lipidomics data containing liquid chromatography, ion mobility spectrometry and mass spectrometry dimensions

---

In the format provided by the authors and unedited

## Supplementary Information for

# Utilizing Skyline to Analyze Lipidomics Data Containing Liquid Chromatography, Ion Mobility Spectrometry and Mass Spectrometry Dimensions

Kaylie I. Kirkwood<sup>1</sup>, Brian S. Pratt<sup>2</sup>, Nicholas Shulman<sup>2</sup>, Kaipo Tamura<sup>2</sup>, Michael J. MacCoss<sup>2</sup>, Brendan X. MacLean<sup>2</sup>, Erin S. Baker<sup>1,3,\*</sup>

<sup>1</sup>*Department of Chemistry, North Carolina State University, Raleigh, NC*

<sup>2</sup>*Department of Genome Sciences, University of Washington, Seattle, WA*

<sup>3</sup>*Comparative Medicine Institute, North Carolina State University, Raleigh, NC*

\*Corresponding author: Erin Baker, [ebaker@ncsu.edu](mailto:ebaker@ncsu.edu)

## Supplementary Methods

### *Plasma Lipid Extraction*

Lipid extractions for each plasma dataset were performed using a modified Folch extraction<sup>1</sup>. First, 600  $\mu\text{L}$  of 2:1  $-20^\circ\text{C}$  chloroform/methanol was added to 50  $\mu\text{L}$  of plasma and vortexed for 30 s. Then 150  $\mu\text{L}$  of water was added and vortexed for 30 s to induce phase separation. The samples sat for 5 min at room temperature then were centrifuged at 10,000xg for 10 min at  $4^\circ\text{C}$ . The samples were then placed on ice to prevent diffusion then an equal volume of the bottom lipid layer was removed and the solvent was evaporated using a SpeedVac. For long-term storage, the lipid extracts were reconstituted in 300  $\mu\text{L}$  of 2:1 chloroform/methanol and stored at  $-20^\circ\text{C}$ . Solvent was evaporated prior to analysis using a SpeedVac and reconstituted in 10  $\mu\text{L}$  of chloroform, then 190  $\mu\text{L}$  of methanol was added. Note that following this extraction method is not required to follow the protocol. It is recommended to use a smaller volume of plasma to conserve samples and prevent column overloading.

### *LC Method*

Either a Waters Acquity UPLC H-Class system or an Agilent 1260 or 1290 Infinity HPLC were used. Sample volumes of 10  $\mu\text{L}$  were injected onto a reversed phase Waters CSH column (3.0 mm x 150 mm x 1.7  $\mu\text{m}$  particle size). Lipids were separated over a 34 min gradient with a mobile phase A of 10 mM ammonium acetate in 40:60 acetonitrile/water and a mobile phase B of 10 mM ammonium acetate in 10:90 acetonitrile/isopropanol at a flow rate of 250  $\mu\text{L}/\text{min}$ . The column was

washed for 4 min. The gradient and column wash and equilibration steps are provided in **Supplementary Table 3**.

**Supplementary Table 3: LC gradient and column wash steps**

| Step          | Time | % A | % B | Flow rate ( $\mu\text{L}/\text{min}$ ) |
|---------------|------|-----|-----|----------------------------------------|
| Gradient      | 0    | 60  | 40  | 250                                    |
| Gradient      | 2    | 50  | 50  | 250                                    |
| Gradient      | 3    | 40  | 60  | 250                                    |
| Gradient      | 12   | 30  | 70  | 250                                    |
| Gradient      | 15   | 25  | 75  | 250                                    |
| Gradient      | 17   | 22  | 78  | 250                                    |
| Gradient      | 19   | 15  | 85  | 250                                    |
| Gradient      | 22   | 8   | 92  | 250                                    |
| Gradient      | 25   | 1   | 99  | 250                                    |
| Gradient      | 34   | 1   | 99  | 250                                    |
| Wash          | 34.5 | 60  | 40  | 300                                    |
| Wash          | 35   | 1   | 99  | 300                                    |
| Wash          | 35.5 | 1   | 99  | 300                                    |
| Equilibration | 36   | 60  | 40  | 305                                    |
| Equilibration | 37   | 60  | 40  | 300                                    |
| Equilibration | 38   | 60  | 40  | 250                                    |

### *IMS-CID-MS Method*

The Agilent 6560 IM-qTOF-MS platform was utilized (Santa Clara, CA) with the commercial gas kit (Alternate Gas Kit, Agilent), a precision flow controller (640B, MKS Instruments) and the Agilent Jet Stream ESI source. IMS-MS data was collected in both positive and negative ionization modes from  $m/z$  50-1700 with a cycle time of 1 s/spectra, an IM trap fill time of 10000  $\mu\text{s}$  and trap release time of 400  $\mu\text{s}$ . Lipids were fragmented via CID using a DIA All Ions method and a ramped collision energy (**Supplementary Table 4**).

**Supplementary Table 4: Collision energy scheme**

| <b>Drift Time</b> | <b>Collision Energy</b> |
|-------------------|-------------------------|
| 0                 | 10                      |
| 15                | 14                      |
| 19                | 27                      |
| 25                | 45                      |
| 40                | 52                      |
| 50                | 58                      |

LC-IMS-CID-MS data was single-field calibrated using Agilent Tune Mix and IM-MS Browser software prior to import.

## Supplementary Figures and Tables

**Supplementary Table 5: Confidence criteria for lipid inclusion in library**

| <b>Criteria</b> | <b>Threshold</b>                                        |
|-----------------|---------------------------------------------------------|
| Lipid presence  | >1 sample                                               |
| Mass error      | $\leq 5$ ppm for precursors, 10 ppm for fragments       |
| Fragments       | Drift-aligned and match literature or in silico spectra |
| Retention time  | Within class-specific window                            |
| CCS             | Within 2% of database value (if present)                |
| CCS vs. m/z     | Fits class-specific trendline                           |

## Supplementary Figure 1: Protocol step 2

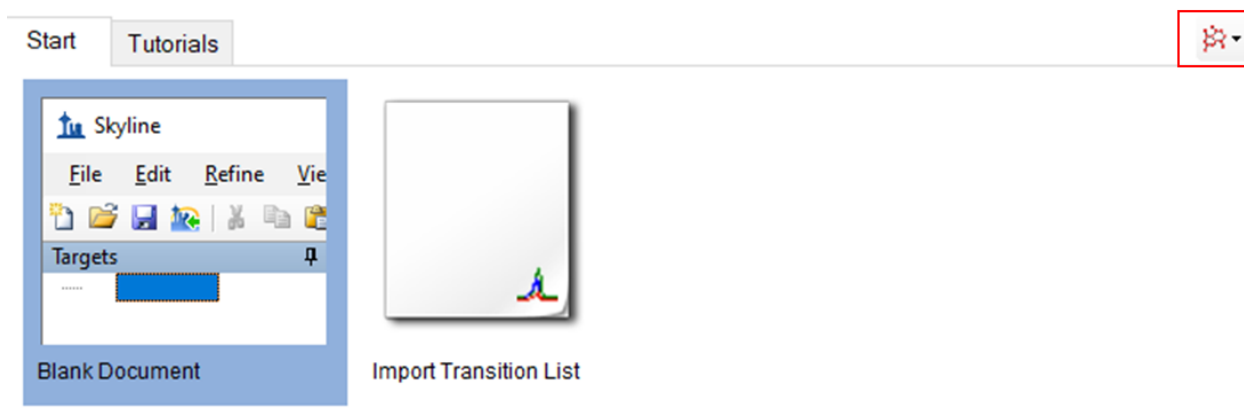

**Supplementary Figure 1.** Screenshot corresponding to step 2 of the protocol where the small molecule interface (highlighted in a red box) is selected on the start page of Skyline.

## Supplementary Figure 2: Protocol step 3B

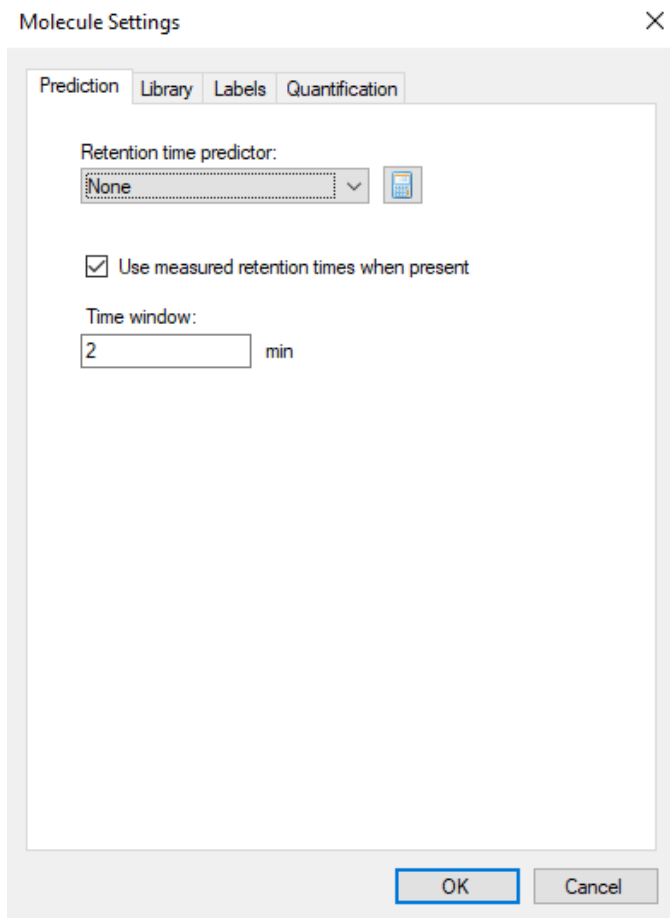

**Supplementary Figure 2.** Screenshot corresponding to step 3B (I) of the protocol to remove the iRT calculator if it is not applicable to your LC method.



### Supplementary Figure 3: Protocol steps 5-8

Transition Settings ×

Prediction Filter Library Instrument Full-Scan Ion Mobility

MS1 filtering

Isotope peaks included:  Precursor mass analyzer:

Peaks:  Resolving power:

Isotope labeling enrichment:

MS/MS filtering

Acquisition method:  Product mass analyzer:

Isolation scheme:  Resolving power:

Use high-selectivity extraction

Retention time filtering

Use only scans within  minutes of MS/MS IDs

Use only scans within  minutes of predicted RT

Include all matching scans

**Supplementary Figure 3.** Screenshot corresponding to steps 5-8 of the protocol which are optional steps to edit the MS settings if different mass spectrometry platforms were used. The settings saved to the library files and shown here are appropriate for a TOF instrument with a resolving power of 20,000-30,000 using a data-independent acquisition method with an all ions fragmentation method.

## Supplementary Figure 4: Protocol steps 9-10

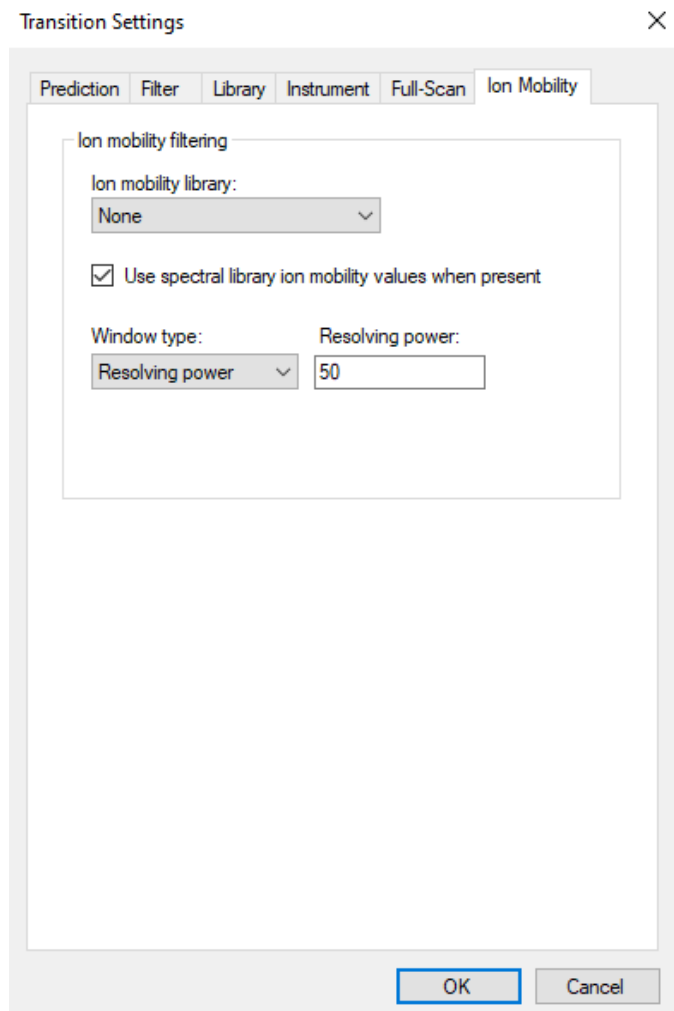

**Supplementary Figure 4.** Screenshot corresponding to steps 9-10 of the protocol which are optional steps to edit the IMS settings if different ion mobility spectrometry platforms were used. The settings saved to the library files and shown here are appropriate for a DTIMS instrument with a resolving power of 50.

## Supplementary Figure 5: Protocol step 12

Import Results

Add single-injection replicates in files

Optimizing:  
None

Add multi-injection replicates in directories

Add one new replicate

Name:  
[Text Input]

Add files to an existing replicate

Name:  
[Dropdown]

---

Files to import simultaneously:  
Many

Show chromatograms during import

Retry after import failure

OK

Cancel

**Supplementary Figure 5.** Screenshot corresponding to step 12 of the protocol to import results. Here, 'Files to import simultaneously' is set to 'Many' and 'Show chromatograms during import' is checked, however the default settings may vary and should not impact the data import.

## Supplementary Figure 6: Protocol steps 14 and 32

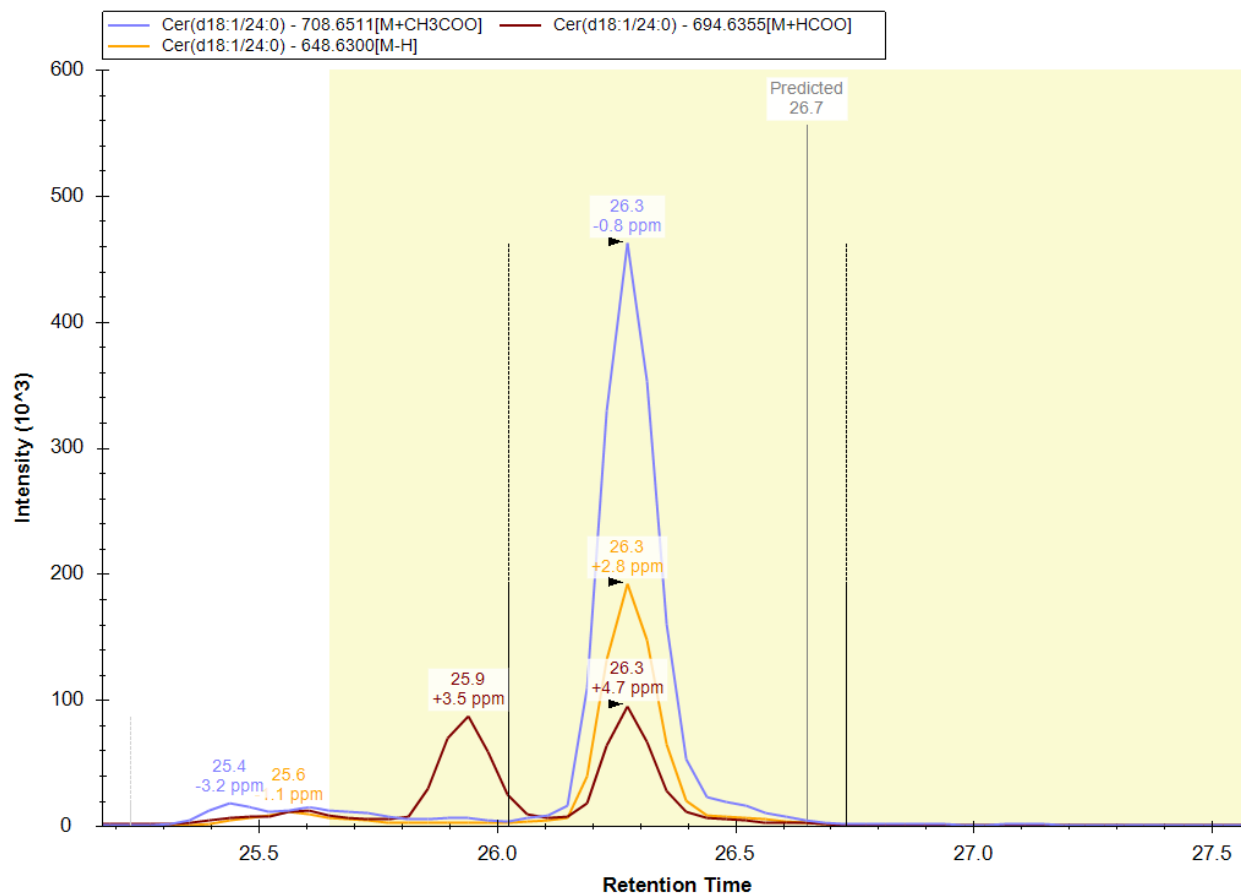

**Supplementary Figure 6.** Screenshot corresponding to steps 14 and 32 of the protocol displaying co-elution of the three adducts for the iRT calibrant lipid Cer(d18:1/24:0) in negative ionization mode. The retention time is predicted at 26.7 min, however this may shift as more iRT calibrant lipid peaks are selected. The mass error of each precursor is displayed above the peak apex. As displayed in the legend, the gray trace corresponds to the acetate-adducted species, the yellow trace corresponds to the deprotonated species, and the brown trace corresponds to the formate-adducted species. Each precursor and its corresponding fragments can be further inspected individually.

## Supplementary Figure 7: Protocol steps 15-16 and 33-34

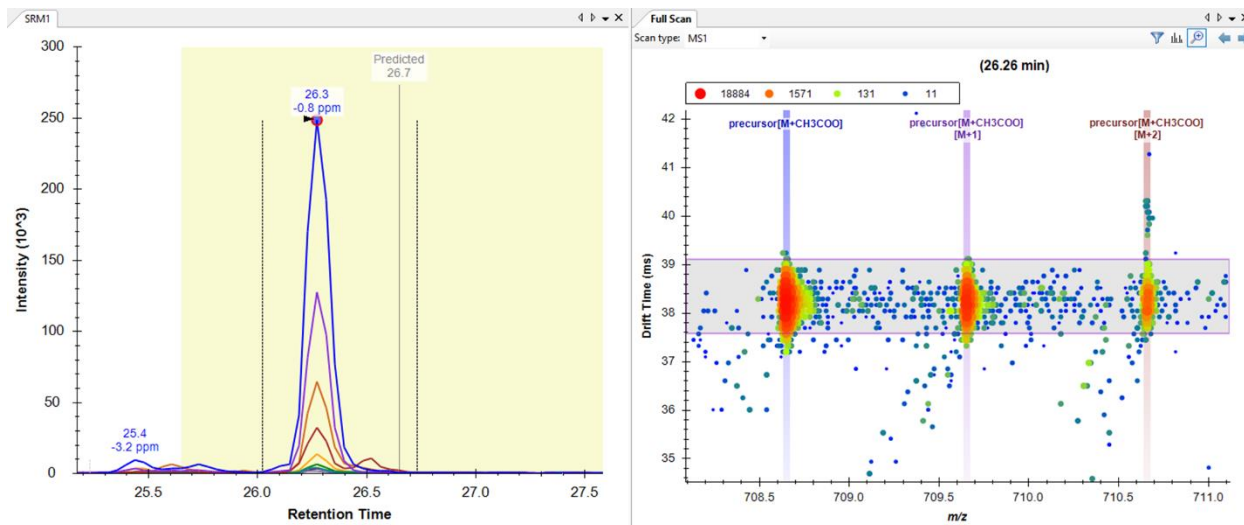

**Supplementary Figure 7.** Screenshot corresponding to steps 15-16 and 33-34 of the protocol where the precursor peak apex of a candidate peak for the iRT calibrant lipid Cer(d18:1/24:0) [M+CH<sub>3</sub>COO]<sup>-</sup> is selected, as shown by Skyline with a red circle, to view the 2D MS spectrum.

## Supplementary Figure 8: Protocol steps 17 and 35

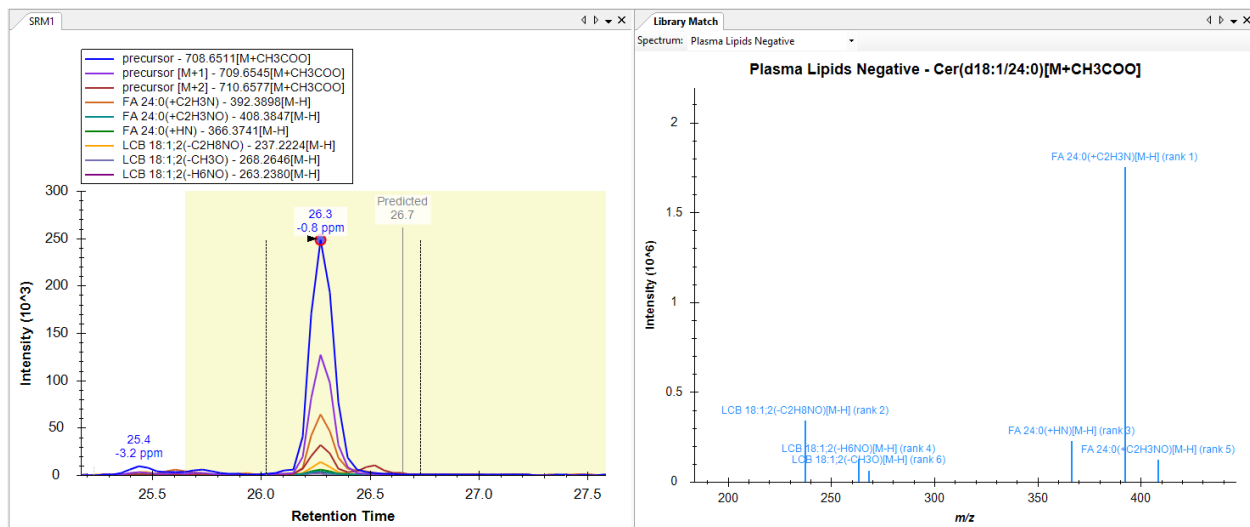

**Supplementary Figure 8.** Screenshot corresponding to steps 17 and 35 of the protocol where the spectral library match for Cer(d18:1/24:0) [M+CH<sub>3</sub>COO]<sup>-</sup> is displayed next to the experimental chromatogram for the same lipid. A legend is displayed in the chromatogram window to identify the corresponding fragments, which can also be individually highlighted when selected in the 'Targets' pane.

## Supplementary Figure 9: Protocol steps 30 and 50

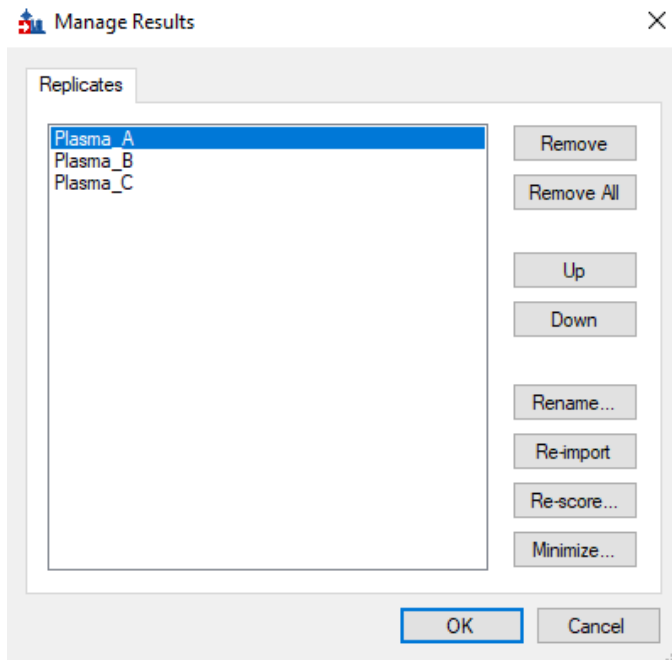

**Supplementary Figure 9.** Screenshot corresponding to steps 30 and 50 of the protocol in order to re-import/extract data after making changes to the target list.

## Supplementary Figure 10: Protocol step 31

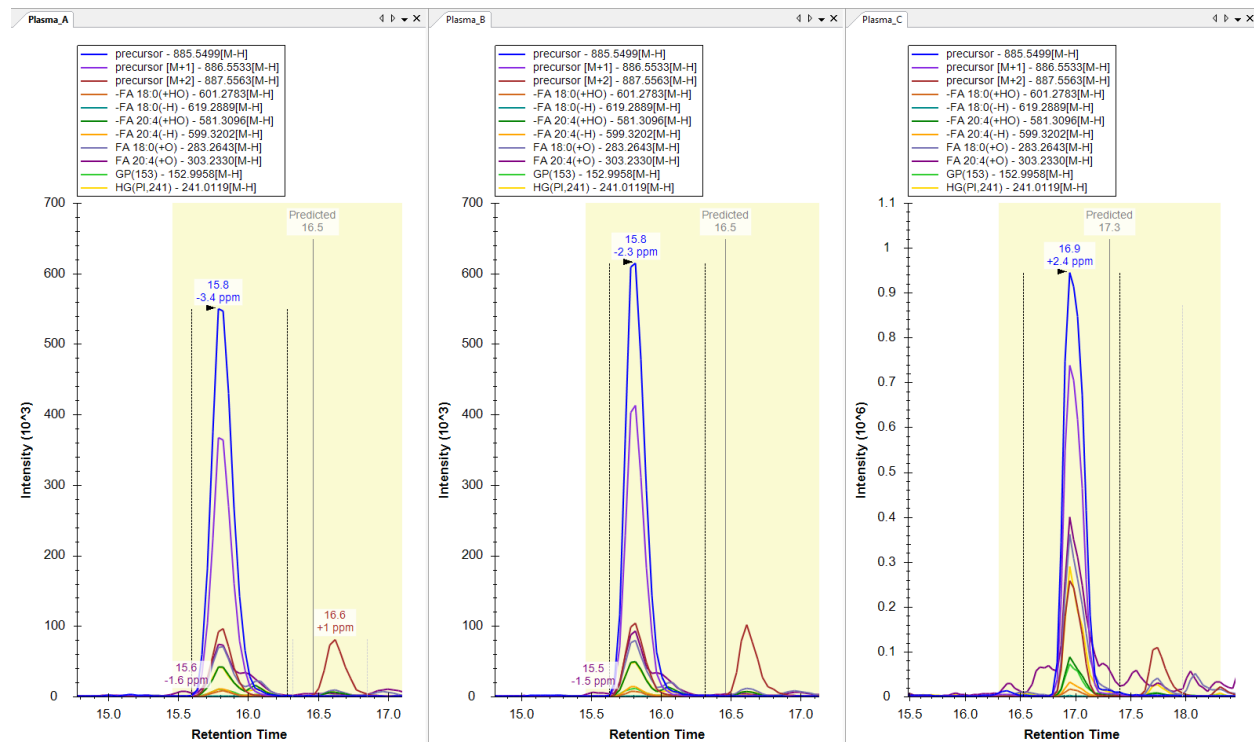

**Supplementary Figure 10.** Screenshot corresponding to step 31 of the protocol where a ‘Tiled’ view is selected to view 3 samples simultaneously. In this example, the lipid PI(18:0\_20:4) [M-H]<sup>-</sup> is in view. Note that the abundances of the fragments relative to the precursor for this lipid in Plasma\_C are higher than those in Plasma\_A and Plasma\_B due to signal saturation in Plasma\_C, as these samples were not from the same sample set and Plasma\_C was collected in a different laboratory.



### Supplementary Figure 11: Protocol step 36

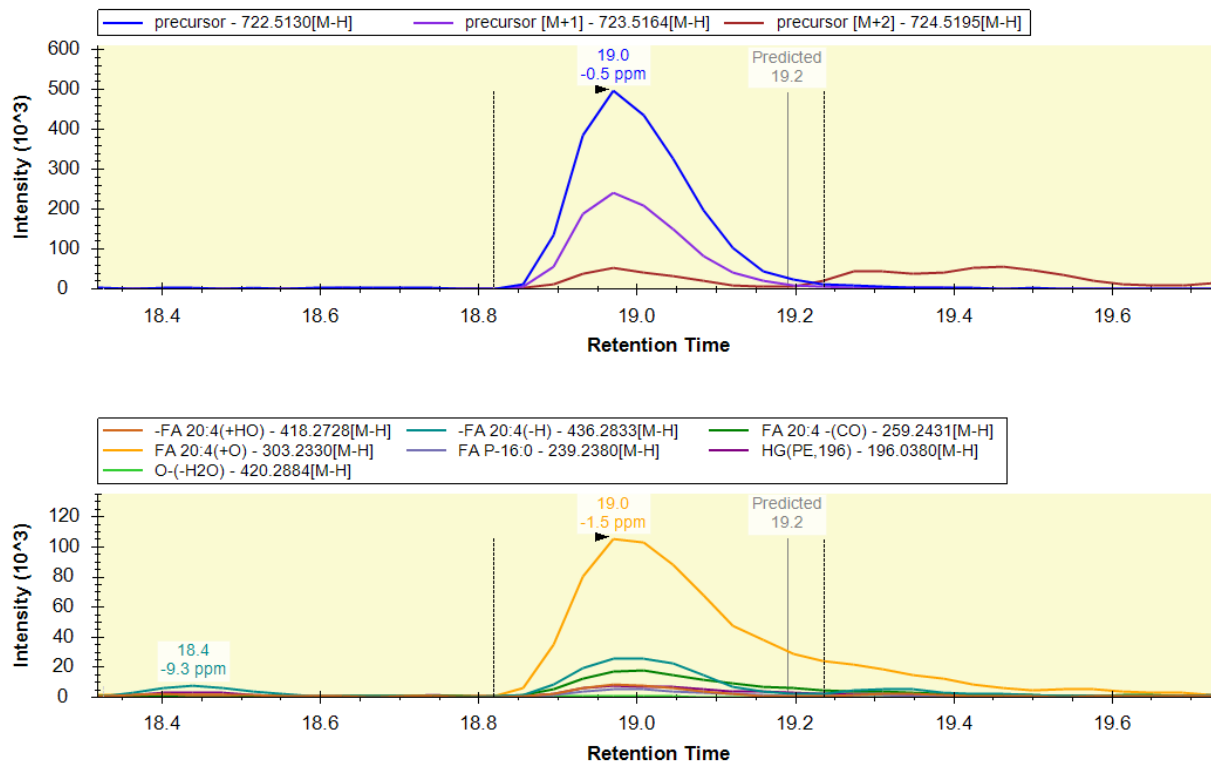

**Supplementary Figure 11.** Screenshot corresponding to step 36 of the protocol where the precursor (top) and fragment (bottom) chromatograms are split into different panes with different y-axis scales. In this example, the lipid PE(P-16:0/20:4) [M-H]<sup>-</sup> is in view.

## Supplementary Figure 12: Protocol step 47

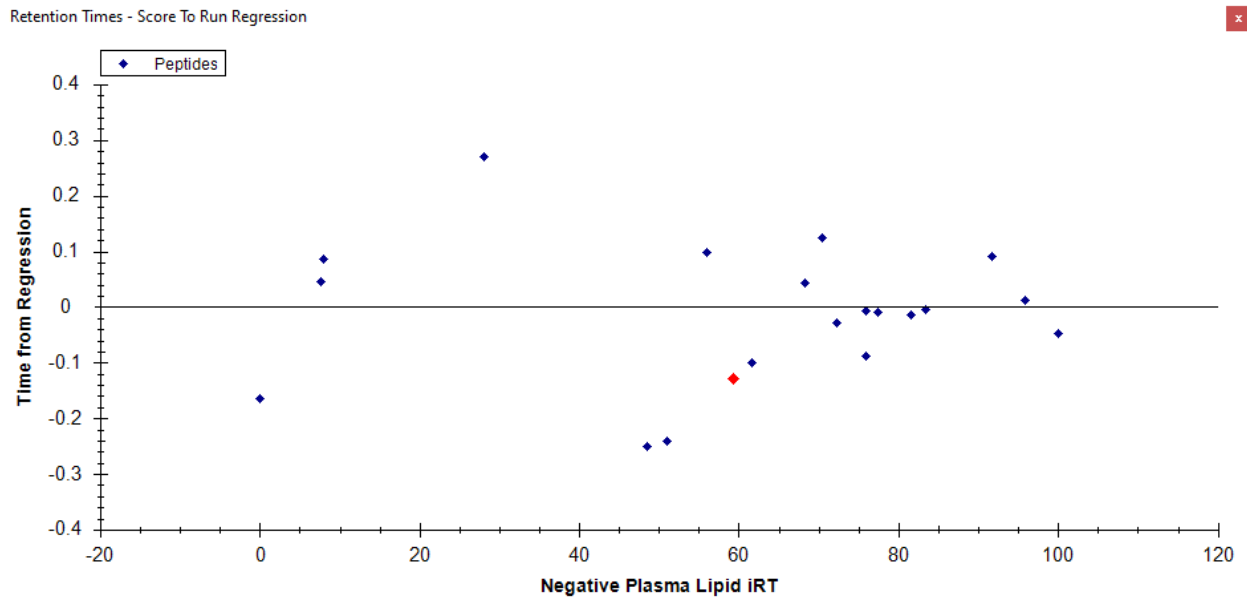

**Supplementary Figure 12.** Screenshot corresponding to step 47 of the protocol where the residuals are plotted in the 'Retention Times – Scores to Run Regression' window to evaluate the iRT prediction performance. In this example, only the 20 calibrant lipids are shown for clarity as opposed to the entire library.

### Supplementary Figure 13: Protocol step 49A

The screenshot shows a software window titled "Insert" with a close button (X) in the top right corner. Below the title bar is a tab labeled "Transition List". The main area contains a table with the following columns: Molecule List Name, Precursor Name, Precursor Fomula, Precursor Adduct, Collisional Cross Section (sq A), Explicit Retention Time, Precursor m/z, and Precursor Charge. The first row of the table is highlighted in blue. Below the table is a large grey rectangular area. At the bottom of the window, there are radio buttons for "Peptides" and "Molecules" (which is selected), and buttons for "Columns...", "Help", "Check for Errors", "Insert", and "Cancel".

|    | Molecule List Name | Precursor Name | Precursor Fomula | Precursor Adduct | Collisional Cross Section (sq A) | Explicit Retention Time | Precursor m/z | Precursor Charge |
|----|--------------------|----------------|------------------|------------------|----------------------------------|-------------------------|---------------|------------------|
| ▶* |                    |                |                  |                  |                                  |                         |               |                  |

**Supplementary Figure 13.** Screenshot corresponding to step 49A of the protocol giving an example of potential columns of interest to add when inserting a transition list for additional lipids beyond the library.

## Supplementary Figure 14: Protocol steps 53-56

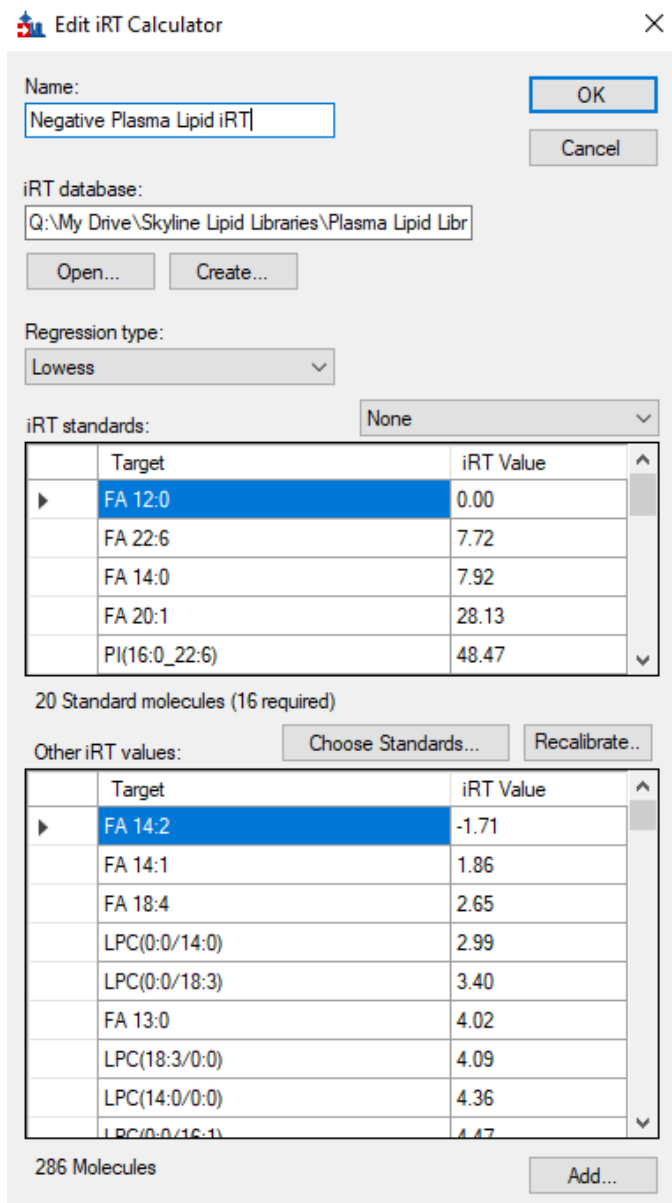

**Supplementary Figure 14.** Screenshot corresponding to steps 53-56 of the protocol to add additional targets to the iRT calculator or choose different standards (calibrant lipids) in the ‘Edit iRT Calculator’ window.

## Supplementary Figure 15: Protocol steps 58 and 62

Preview: Lipid Results

of 720 | Export... Actions | Find:

| Replicate Name | Lipid                          | Precursor Mz | Precursor Charge | Retention Time | Area     | Background | Total Ion Current Area | Collisional Cross Section | Mass Error PPM | Fragment Ion    | Product Mz | Product Charge |
|----------------|--------------------------------|--------------|------------------|----------------|----------|------------|------------------------|---------------------------|----------------|-----------------|------------|----------------|
| Plasma_C       | <a href="#">FA 22:6</a>        | 327.232954   | -1               | 7.01           | 400566   | 0          | 408349632              | 187.93                    | 0.9            | precursor [M+1] | 328.236367 | -1             |
| Plasma_A       | <a href="#">FA 22:6</a>        | 327.232954   | -1               | 6.67           | 16378    | 80         | 93677192               | 187.93                    | -2.5           | precursor [M+2] | 329.239463 | -1             |
| Plasma_B       | <a href="#">FA 22:6</a>        | 327.232954   | -1               | 6.7            | 7733     | 0          | 89837408               | 187.93                    | -3             | precursor [M+2] | 329.239463 | -1             |
| Plasma_C       | <a href="#">FA 22:6</a>        | 327.232954   | -1               | 7.05           | 56893    | 0          | 408349632              | 187.93                    | 2.5            | precursor [M+2] | 329.239463 | -1             |
| Plasma_A       | <a href="#">FA 14:0</a>        | 227.201654   | -1               | 6.74           | 3614368  | 68788      | 93677192               | 161.92                    | 6.9            | precursor       | 227.201654 | -1             |
| Plasma_B       | <a href="#">FA 14:0</a>        | 227.201654   | -1               | 6.74           | 3548389  | 19134      | 89837408               | 161.92                    | 7.1            | precursor       | 227.201654 | -1             |
| Plasma_C       | <a href="#">FA 14:0</a>        | 227.201654   | -1               | 6.98           | 11527961 | 172185     | 408349632              | 161.92                    | 1              | precursor       | 227.201654 | -1             |
| Plasma_A       | <a href="#">FA 14:0</a>        | 227.201654   | -1               | 6.74           | 730027   | 8114       | 93677192               | 161.92                    | -0.6           | precursor [M+1] | 228.205088 | -1             |
| Plasma_B       | <a href="#">FA 14:0</a>        | 227.201654   | -1               | 6.74           | 703064   | 5084       | 89837408               | 161.92                    | -0.5           | precursor [M+1] | 228.205088 | -1             |
| Plasma_C       | <a href="#">FA 14:0</a>        | 227.201654   | -1               | 6.98           | 5067356  | 19256      | 408349632              | 161.92                    | -4             | precursor [M+1] | 228.205088 | -1             |
| Plasma_A       | <a href="#">FA 14:0</a>        | 227.201654   | -1               | 6.74           | 63415    | 0          | 93677192               | 161.92                    | 4.8            | precursor [M+2] | 229.207846 | -1             |
| Plasma_B       | <a href="#">FA 14:0</a>        | 227.201654   | -1               | 6.74           | 54728    | 0          | 89837408               | 161.92                    | 5.2            | precursor [M+2] | 229.207846 | -1             |
| Plasma_C       | <a href="#">FA 14:0</a>        | 227.201654   | -1               | 6.98           | 833832   | 0          | 408349632              | 161.92                    | 0              | precursor [M+2] | 229.207846 | -1             |
| Plasma_A       | <a href="#">FA 20:1</a>        | 309.279905   | -1               | 10.43          | 749880   | 811        | 93677192               | 182.99                    | -6.3           | precursor       | 309.279905 | -1             |
| Plasma_B       | <a href="#">FA 20:1</a>        | 309.279905   | -1               | 10.42          | 226800   | 3725       | 89837408               | 182.99                    | -6.4           | precursor       | 309.279905 | -1             |
| Plasma_C       | <a href="#">FA 20:1</a>        | 309.279905   | -1               | 10.93          | 3083106  | 11559      | 408349632              | 182.99                    | 0.5            | precursor       | 309.279905 | -1             |
| Plasma_A       | <a href="#">FA 20:1</a>        | 309.279905   | -1               | 10.43          | 158103   | 2821       | 93677192               | 182.99                    | -3.9           | precursor [M+1] | 310.283334 | -1             |
| Plasma_B       | <a href="#">FA 20:1</a>        | 309.279905   | -1               | 10.42          | 41368    | 100        | 89837408               | 182.99                    | -4.1           | precursor [M+1] | 310.283334 | -1             |
| Plasma_C       | <a href="#">FA 20:1</a>        | 309.279905   | -1               | 10.93          | 863770   | 2040       | 408349632              | 182.99                    | 1.3            | precursor [M+1] | 310.283334 | -1             |
| Plasma_A       | <a href="#">FA 20:1</a>        | 309.279905   | -1               | 10.43          | 33814    | 734        | 93677192               | 182.99                    | -5.9           | precursor [M+2] | 311.286388 | -1             |
| Plasma_B       | <a href="#">FA 20:1</a>        | 309.279905   | -1               | 10.42          | 8071     | 3353       | 89837408               | 182.99                    | -3.5           | precursor [M+2] | 311.286388 | -1             |
| Plasma_C       | <a href="#">FA 20:1</a>        | 309.279905   | -1               | 10.93          | 78509    | 1626       | 408349632              | 182.99                    | -1             | precursor [M+2] | 311.286388 | -1             |
| Plasma_A       | <a href="#">PI(16:0, 22:6)</a> | 881.518554   | -1               | 13.25          | 55824    | 1303       | 93677192               | 293.56                    | -2.1           | precursor       | 881.518554 | -1             |
| Plasma_B       | <a href="#">PI(16:0, 22:6)</a> | 881.518554   | -1               | 13.28          | 40347    | 1062       | 89837408               | 293.56                    | -0.8           | precursor       | 881.518554 | -1             |
| Plasma_C       | <a href="#">PI(16:0, 22:6)</a> | 881.518554   | -1               | 14.37          | 128632   | 10783      | 408349632              | 293.56                    | 4.2            | precursor       | 881.518554 | -1             |
| Plasma_A       | <a href="#">PI(16:0, 22:6)</a> | 881.518554   | -1               | 13.21          | 28098    | 3485       | 93677192               | 293.56                    | -4.9           | precursor [M+1] | 882.52198  | -1             |
| Plasma_B       | <a href="#">PI(16:0, 22:6)</a> | 881.518554   | -1               | 13.24          | 20580    | 3419       | 89837408               | 293.56                    | -3.5           | precursor [M+1] | 882.52198  | -1             |
| Plasma_C       | <a href="#">PI(16:0, 22:6)</a> | 881.518554   | -1               | 14.41          | 81029    | 6337       | 408349632              | 293.56                    | 3.8            | precursor [M+1] | 882.52198  | -1             |
| Plasma_A       | <a href="#">PI(16:0, 22:6)</a> | 881.518554   | -1               | 13.29          | 8679     | 1347       | 93677192               | 293.56                    | -5.9           | precursor [M+2] | 883.524986 | -1             |
| Plasma_B       | <a href="#">PI(16:0, 22:6)</a> | 881.518554   | -1               | 13.24          | 8353     | 16         | 89837408               | 293.56                    | -2.5           | precursor [M+2] | 883.524986 | -1             |
| Plasma_C       | <a href="#">PI(16:0, 22:6)</a> | 881.518554   | -1               | 14.37          | 24396    | 6545       | 408349632              | 293.56                    | 1.2            | precursor [M+2] | 883.524986 | -1             |
| Plasma_A       | <a href="#">PI(16:0, 22:6)</a> | 881.518554   | -1               | 13.25          | 511      | 0          | 93677192               | 293.56                    | -3.6           | -FA 16:0(+HO)   | 625.278324 | -1             |
| Plasma_B       | <a href="#">PI(16:0, 22:6)</a> | 881.518554   | -1               | 13.32          | 147      | 0          | 89837408               | 293.56                    | -3.1           | -FA 16:0(+HO)   | 625.278324 | -1             |
| Plasma_C       | <a href="#">PI(16:0, 22:6)</a> | 881.518554   | -1               | 14.48          | 859      | 0          | 408349632              | 293.56                    | 0.1            | -FA 16:0(+HO)   | 625.278324 | -1             |

**Supplementary Figure 15.** Screenshot corresponding to steps 58 and 62 of the protocol of an example report preview.

In this example, a custom report was developed which includes replicate (sample) name, lipid name, precursor m/z and charge, retention time, peak area, background signal, total ion current area, CCS, mass error, fragment ion name, and product m/z and charge.

## Supplementary Figure 16: Protocol steps 59-60

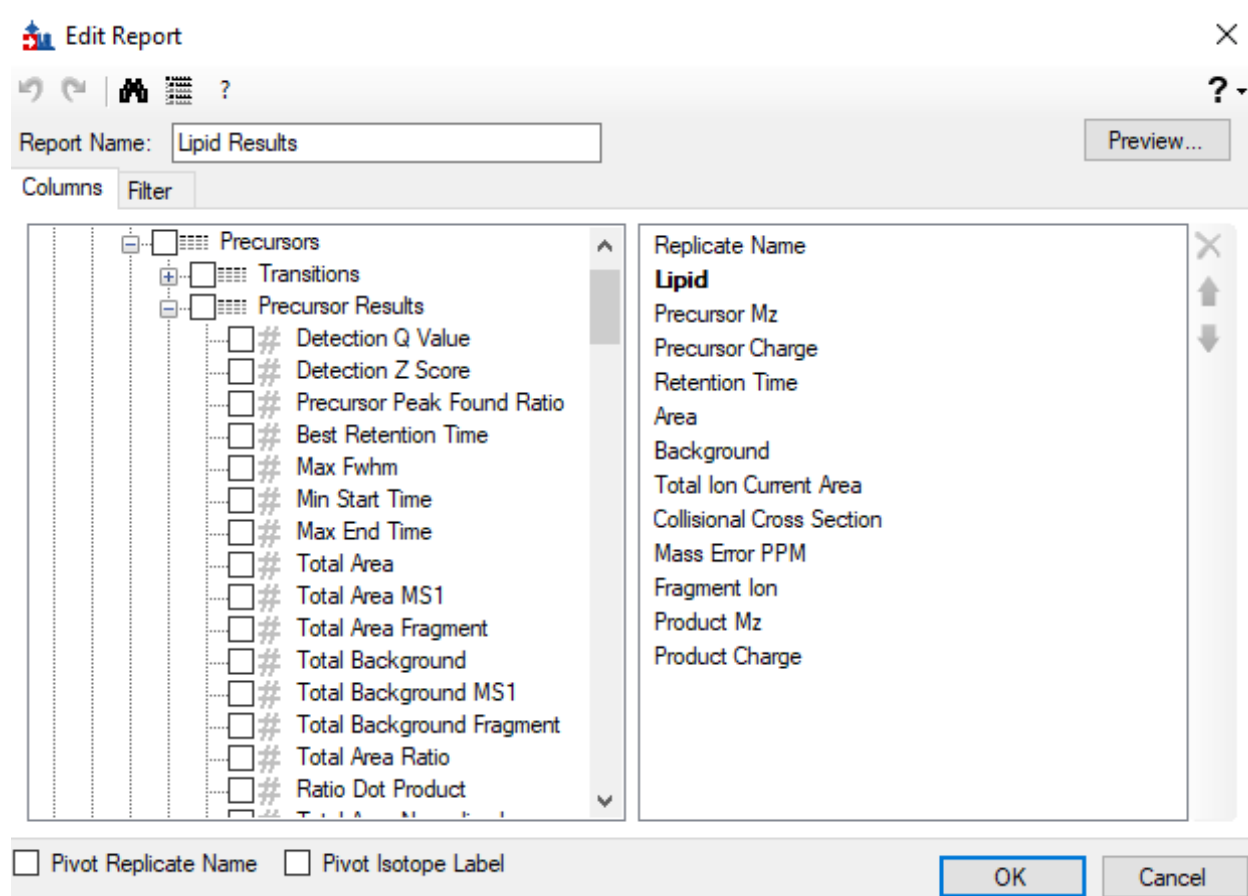

**Supplementary Figure 16.** Screenshot corresponding to steps 59-60 of the protocol displaying the hierarchical list which can be used to select additional columns or delete/rename existing columns for the exported report. The binocular icon in the top left corner can be used to search for specific terms.

## Supplementary Figure 17: Co-eluting isobaric species

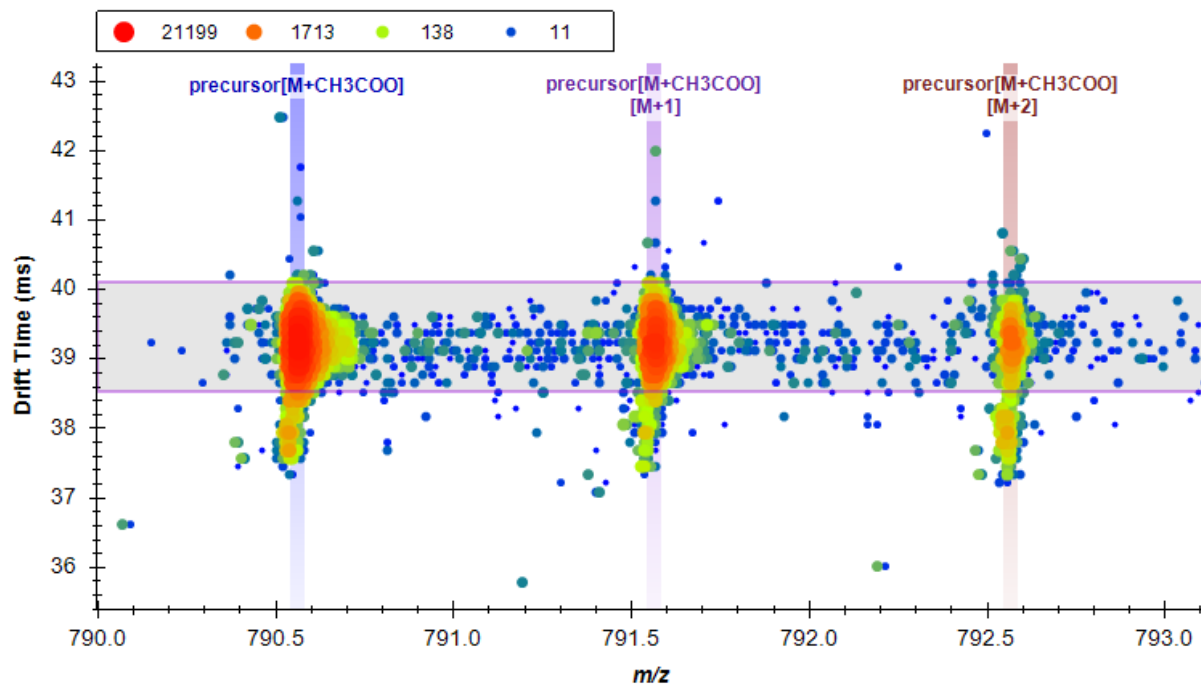

**Supplementary Figure 17.** Example of MS1 drift time filtering of interferences. In this case, an isobar of PC(16:0\_16:1) [M+CH<sub>3</sub>COO]<sup>-</sup> is co-eluting in the LC dimension and would contribute to the extracted precursor ion intensities if drift time filtering was not utilized. However, these isobars are well-separated in the IMS drift time dimension, thus the interference is filtered out.

## References

1. Folch, J.; Lees, M.; Sloane Stanley, G. H., A simple method for the isolation and purification of total lipides from animal tissues. *J Biol Chem* **1957**, 226 (1), 497-509.
